# Supplementary material
Source: PubMed Central journal article supplement (PMC3314285)
Supplement: supp_bgr064_Supp_Table_4.pdf [file supp_bgr064_Supp_Table_4.pdf]

| Symbol    | Accession number | Name                                                                | Difference | p-value | Frequency |
|-----------|------------------|---------------------------------------------------------------------|------------|---------|-----------|
| ABCB7     | NM_004299.3      | ATP-binding cassette, sub-family B (MDR/TAP), member 7              | 0.327      | 0.0043  | 96.1      |
| ACCS      | NM_004299        | 1-aminocyclopropane-1-carboxylate synthase homologue                | -0.159     | 0.0053  | 81        |
| ACE       | NM_000789.2      | Angiotensin I converting enzyme (peptidyl-dipeptidase A) 1          | -0.137     | 0.0046  | 92.2      |
| ACOT9     | NM_012332.1      | acyl-CoA thioesterase 9                                             | 0.348      | 0.0045  | 92.1      |
| ACTR3     | NM_005721.3      | ARP3 actin-related protein 3 homolog (yeast)                        | 0.303      | 0.0050  | 73.9      |
| AGA       | NM_000027.2      | Aspartylglucosaminidase                                             | 0.285      | 0.0053  | 76.8      |
| AHI1      | NM_017651.3      | Abelson helper integration site 1                                   | 0.383      | 0.0045  | 73.9      |
| ALDH3A2   | NM_000382.1      | Aldehyde dehydrogenase 3 family, member A2                          | 0.268      | 0.0050  | 100       |
| AMAC1L1   | NM_054028        | acyl-malonyl condensing enzyme 1-like 1                             | -0.326     | 0.0034  | 82.7      |
| ANKRD13A  | NM_033121.1      | Ankyrin repeat domain 13A                                           | 0.416      | 0.0046  | 88.8      |
| ARIH1     | NM_005744.2      | Ariadne homolog, ubiquitin-conjugating enzyme E2 binding protein, 1 | 0.436      | 0.0048  | 100       |
| ATP6V0B   | NM_004047.2      | ATPase, H+ transporting, lysosomal 21kDa, V0 subunit b              | 0.337      | 0.0046  | 92.2      |
| ATP6V1B2  | NM_001693.2      | ATPase, H+ transporting, lysosomal 56/58kDa, V1 subunit B2          | 0.142      | 0.0053  | 73.4      |
| BCR       | BC066122.1       | Breakpoint cluster region                                           | -0.092     | 0.0042  | 80.6      |
| BNIP3     | NM_004052.2      | BCL2/adenovirus E1B 19kDa interacting protein 3                     | 0.746      | 0.0042  | 100       |
| BRCTD1    | XM_376413.2      | BRCT domain containing 1                                            | -0.135     | 0.0049  | 76.9      |
| C14orf109 | XM_058628.8      | Chromosome 14 open reading frame 109                                | 0.503      | 0.0070  | 75.8      |
| C20orf85  | NM_178456.2      | Chromosome 20 open reading frame 85                                 | -0.281     | 0.0034  | 100       |
| C5orf42   | NM_018691.1      | Chromosome 5 open reading frame 42                                  | -0.232     | 0.0048  | 74.2      |
| C6orf62   | NM_030939.3      | Chromosome 6 open reading frame 62                                  | 0.273      | 0.0045  | 100       |
| CCDC120   | AK001937.1       | cDNA FLJ11075 fis                                                   | 0.132      | 0.0055  | 80.9      |
| CCDC33    | BC009178.2       | Coiled-coil domain containing 33                                    | 0.163      | 0.0044  | 80.9      |
| CEP55     | BC008947.2       | Centrosomal protein 55kDa                                           | 0.758      | 0.0030  | 100       |
| CHCHD3    | NM_017812.1      | Coiled-coil-helix-coiled-coil-helix domain containing 3             | 0.269      | 0.0034  | 96.1      |
| CKAP2     | NM_018204.2      | Cytoskeleton associated protein 2                                   | 0.532      | 0.0047  | 77.2      |
| CLEC1A    | NM_016511.2      | C-type lectin domain family 1, member A                             | -0.239     | 0.0046  | 95.9      |
| CLPX      | NM_006660.3      | ClpX caseinolytic peptidase X homolog (E. coli)                     | 0.476      | 0.0038  | 84.6      |
| CNOT7     | NM_013354.4      | CCR4-NOT transcription complex, subunit 7                           | 0.103      | 0.0055  | 77.1      |
| CRY2      | NM_021117.1      | Cryptochrome 2 (photolyase-like)                                    | -0.433     | 0.0044  | 96.1      |
| CRYAA     | X14789.1         | Crystallin, alpha A                                                 | -0.210     | 0.0043  | 100       |
| CSDA      | NM_003651.3      | Cold shock domain protein A                                         | -0.204     | 0.0049  | 78.4      |
| CTNNB1    | NM_001904.2      | Catenin (cadherin-associated protein), beta 1, 88kDa                | 0.387      | 0.0046  | 76.8      |
| CTTNBP2NL | NM_018704.1      | CTTNBP2 N-terminal like                                             | -0.095     | 0.0045  | 96.1      |
| CYB5R2    | AL133582.1       | Cytochrome b5 reductase 2                                           | -0.173     | 0.0052  | 84.8      |
| DDX10     | NM_004398.2      | DEAD (Asp-Glu-Ala-Asp) box polypeptide 10                           | 0.463      | 0.0042  | 88.8      |

|          |             |                                                                     |        |        |      |
|----------|-------------|---------------------------------------------------------------------|--------|--------|------|
| DIAPH1   | NM_005219.2 | Diaphanous homolog 1 (Drosophila)                                   | 0.370  | 0.0048 | 96.1 |
| DNAJA1   | NM_001539.2 | DnaJ (Hsp40) homolog, subfamily A, member 1                         | 0.254  | 0.0053 | 92.6 |
| DNAJC3   | NM_006260.2 | DnaJ (Hsp40) homolog, subfamily C, member 3                         | 0.141  | 0.0056 | 92.6 |
| DTX2     | AB040961.1  | Deltex homolog 2 (Drosophila)                                       | -0.099 | 0.0046 | 88.2 |
| EFG1     | AK022724.1  | EFG1 Elongation Factor G, Mitochondrial 1                           | 0.299  | 0.0046 | 100  |
| EIF4E    | NM_001968.2 | Eukaryotic translation initiation factor 4E                         | 0.377  | 0.0051 | 92.1 |
| EMX2     | NM_004098.2 | Empty spiracles homeobox 2                                          | -0.255 | 0.0049 | 100  |
| EPB41    | NM_004437.2 | Erythrocyte membrane protein band 4.1 (elliptocytosis 1, RH-linked) | -0.274 | 0.0036 | 76.8 |
| ERI1     | NM_153332.2 | exoribonuclease 1                                                   | 0.137  | 0.0044 | 88.6 |
| FAIM     | NM_018147.2 | Fas apoptotic inhibitory molecule 3                                 | 0.428  | 0.0048 | 100  |
| FAM40B   | NM_020704.1 | Family with sequence similarity 40, member B                        | -0.362 | 0.0048 | 88.4 |
| FAM46C   | NM_017709.2 | Family with sequence similarity 46, member C                        | -0.075 | 0.0055 | 73.5 |
| FAM65A   | NM_024519.2 | Family with sequence similarity 65, member A                        | -0.244 | 0.0046 | 84.9 |
| GABBR2   | NM_005458   | gamma aminobutyric acid (GABA) B receptor 2                         | -0.171 | 0.0051 | 77.6 |
| GLTP     | NM_016433.3 | glycolipid transfert protein                                        | -0.110 | 0.0038 | 80.9 |
| GNAS     | AJ224868.1  | GNAS1 gene                                                          | -0.138 | 0.0038 | 88.2 |
| GNG12    | NM_018841.3 | Guanine nucleotide binding protein (G protein), gamma 12            | 0.163  | 0.0050 | 77.1 |
| GSTM5    | NM_000851.2 | Glutathione S-transferase mu 5                                      | 0.030  | 0.0057 | 73.9 |
| HGF      | X16323.1    | hepatocyte growth factor (hepapoietin A; scatter factor)            | -0.306 | 0.0051 | 80.8 |
| HOXB5    | NM_002147.2 | Homeobox B5                                                         | 0.147  | 0.0043 | 92.6 |
| HPCA     | NM_002143.2 | Hippocalcin                                                         | -0.326 | 0.0051 | 73.5 |
| IGDCC4   | NM_020962   | immunoglobulin superfamily DCC subclass member 4                    | -0.120 | 0.0050 | 81   |
| IKBKE    | NM_014002.2 | Inhibitor of kappa light polypeptide gene enhancer, kinase epsilon  | -0.064 | 0.0055 | 100  |
| IL16     | NM_004513.3 | Interleukin 16 (lymphocyte chemoattractant factor)                  | -0.079 | 0.0055 | 81.1 |
| ITGA11   | NM_012211.3 | Integrin alpha 11                                                   | -0.247 | 0.0051 | 84.6 |
| KCTD17   | BC009961.2  | potassium channel tetramerization domain containing 17              | -0.143 | 0.0052 | 84.8 |
| KIAA1704 | NM_018559.2 | KIAA1704                                                            | 0.316  | 0.0044 | 84.6 |
| LRRC37A  | NM_014834.2 | Leucine rich repeat containing 37A                                  | -0.228 | 0.0047 | 81.1 |
| LRRFIP2  | NM_017724.1 | Leucine rich repeat (in FLII) interacting protein 2                 | 0.043  | 0.0055 | 100  |
| MAGED4   | AL136582.1  | Melanoma antigen family D, 4                                        | 0.333  | 0.0037 | 100  |
| MLLT6    | BC007859.2  | Myeloid/lymphoid or mixed-lineage leukemia; translocated to, 6      | -0.206 | 0.0029 | 81.1 |
| MRPS18C  | NM_016067.1 | Mitochondrial ribosomal protein S18C                                | 0.468  | 0.0042 | 88.8 |
| MRS2L    | NM_020662.1 | MRS2 magnesium homeostasis factor homolog (S. cerevisiae)           | 0.571  | 0.0048 | 77.2 |
| MTCH2    | NM_014342.2 | Mitochondrial carrier homolog 2 (C. elegans)                        | 0.241  | 0.0050 | 88.6 |
| MTHFD2   | NM_006636.2 | Mitochondrial carrier homolog 2 (C. elegans)                        | 0.500  | 0.0047 | 92.1 |
| MYCN     | AJ242956.1  | myc myelocytomatosis viral related oncogene                         | -0.148 | 0.0047 | 100  |
| MYL12B   | NM_033546   | myosin liht chain 12B regultory                                     | 0.252  | 0.0040 | 74.5 |

|          |             |                                                                    |        |        |      |
|----------|-------------|--------------------------------------------------------------------|--------|--------|------|
| N4BP2    | NM_018177.2 | NEDD4 binding protein 2                                            | -0.293 | 0.0046 | 92.2 |
| NDUFAF2  | NM_174889.2 | NADH dehydrogenase 1 alpha subcomplex, assembly factor 2           | 0.342  | 0.0052 | 84.6 |
| NOX1     | NM_007052.3 | NADPH oxidase 1                                                    | -0.297 | 0.0049 | 84.4 |
| NRBP1    | NM_013392.2 | nuclear receptor binding protein 1                                 | -0.180 | 0.0044 | 100  |
| OCIAD1   | NM_017830.1 | ovarian cancer immuno-reactive antigen domain containing 1         | 0.378  | 0.0045 | 100  |
| OCRL     | NM_013341.3 | Inositol polyphosphate 5-phosphatase OCRL-1                        | -0.218 | 0.0043 | 91   |
| OLA1     | NM_013341   | Obg-like ATPase 1                                                  | 0.577  | 0.0041 | 81   |
| ORAI2    | NM_032831   | ORAI calcium release-activated calcium modulator 2                 | 0.307  | 0.0053 | 86.2 |
| OTOP2    | NM_178160.1 | otopettrin 2                                                       | -0.187 | 0.0046 | 84.8 |
| PAPOLA   | NM_032632.3 | Poly(A) polymerase alpha                                           | 0.573  | 0.0036 | 76.6 |
| PARP4    | NM_006437.2 | Poly (ADP-ribose) polymerase family, member 4                      | 0.011  | 0.0059 | 73.5 |
| PBOV1    | NM_021635.1 | Prostate and breast cancer overexpressed 1                         | -0.272 | 0.0045 | 73.4 |
| PCNXL2   | NM_014801.2 | Pecanex-like 2 (Drosophila)                                        | -0.430 | 0.0042 | 96.1 |
| PCTK3    | BC040529.1  | PCTAIRE protein kinase 3                                           | -0.257 | 0.0043 | 92.6 |
| PHF10    | NM_018288.2 | PHD finger protein 10                                              | 0.264  | 0.0044 | 96.1 |
| PHKB     | NM_000293.1 | Phosphorylase kinase, beta                                         | -0.277 | 0.0050 | 73.9 |
| PIGL     | NM_004278.2 | phosphatidylinositol glycan anchor biosynthesis. class L           | -0.340 | 0.0049 | 81.1 |
| PIK4CB   | NM_002651.1 | Phosphatidylinositol 4-kinase, catalytic, beta                     | -0.340 | 0.0049 | 100  |
| PLAC2    | BC036545.1  | Placenta-specific 2 (non-protein coding)                           | -0.095 | 0.0054 | 71.5 |
| PNPT1    | NM_033109.2 | polyribonucleotide nucleotidyltransferase 1                        | 0.449  | 0.0044 | 88.5 |
| PODNL1   | NM_024825.2 | Podocan-like 1                                                     | 0.154  | 0.0050 | 92.2 |
| POLR2B   | NM_000938.1 | Polymerase (RNA) II (DNA directed) polypeptide B, 140kDa           | 0.239  | 0.0040 | 76.8 |
| PPAT     | NM_002703.3 | Phosphoribosyl pyrophosphate amidotransferase                      | 0.337  | 0.0046 | 80   |
| PPIL3    | BC007693.2  | Peptidylprolyl isomerase (cyclophilin)-like 3                      | 0.298  | 0.0048 | 88.2 |
| PPM1J    | NM_005167.5 | Protein phosphatase, Mg2+/Mn2+ dependent, 1J                       | -0.025 | 0.0056 | 80.8 |
| PSAP     | NM_002778.1 | Prosaposin                                                         | -0.236 | 0.0051 | 75.2 |
| PSMD14   | NM_005805.2 | Proteasome (prosome, macropain) 26S subunit, non-ATPase, 14        | 0.409  | 0.0049 | 92.1 |
| PSMD2    | NM_002808.3 | Proteasome (prosome, macropain) 26S subunit, non-ATPase, 2         | 0.306  | 0.0050 | 100  |
| RBM38    | NM_017495.4 | RNA binding motif protein 38                                       | -0.298 | 0.0045 | 79   |
| RBPJ     | BC020780.1  | recombination signal binding protein immunoglobulin kappa J region | -0.449 | 0.0047 | 92.2 |
| RLIM     | NM_016120.2 | Ring finger protein, LIM domain interacting                        | 0.412  | 0.0035 | 82.7 |
| SALL2    | NM_005407.1 | Sal-like 2 (Drosophila)                                            | -0.040 | 0.0056 | 75   |
| SDC4     | NM_002999.2 | Syndecan 4                                                         | -0.009 | 0.0058 | 86.8 |
| SEC24B   | NM_006323.1 | SEC24 family, member B (S. cerevisiae)                             | 0.295  | 0.0047 | 70.8 |
| SEPTIN   | AY679521.1  | Septin 6                                                           | -0.304 | 0.0047 | 80.9 |
| SERPINB6 | NM_004568.4 | Serpin peptidase inhibitor, clade B (ovalbumin), member 6          | 0.202  | 0.0055 | 74.1 |
| SERPINB8 | NM_002640.3 | Serpin peptidase inhibitor, clade B (ovalbumin), member 8          | 0.219  | 0.0054 | 77.1 |

|         |             |                                                                      |        |        |      |
|---------|-------------|----------------------------------------------------------------------|--------|--------|------|
| SLC38A2 | NM_018976.3 | Solute carrier family 38, member 2                                   | 0.322  | 0.0048 | 84.4 |
| SMARCD3 | NM_003078.3 | SWI/SNF related,matrix associated, regulator of chromatin, member d3 | -0.354 | 0.0045 | 72.7 |
| SNX25   | NM_031953.2 | Sorting nexin 25                                                     | 0.379  | 0.0041 | 84.8 |
| SOLH    | NM_005632.2 | Small optic lobes homolog (Drosophila)                               | -0.303 | 0.0040 | 70.2 |
| SP100   | NM_003113.2 | SP100 nuclear antigen                                                | 0.326  | 0.0037 | 82.9 |
| SP4     | NM_003112   | Sp4 transcription factor                                             | -0.220 | 0.0049 | 100  |
| SS18L2  | NM_016305.1 | Synovial sarcoma translocation gene on chromosome 18-like 2          | 0.410  | 0.0045 | 75   |
| STX5    | NM_003164.2 | Syntaxin 5                                                           | -0.359 | 0.0047 | 84.8 |
| SUPT5H  | NM_003169.2 | Suppressor of Ty 5 homolog (S. cerevisiae)                           | -0.356 | 0.0030 | 92.6 |
| TAOK3   | NM_016281.2 | TAO kinase 3                                                         | -0.422 | 0.0048 | 80.8 |
| TM9SF2  | NM_004800.1 | Transmembrane 9 superfamily member 2                                 | 0.142  | 0.0052 | 86.8 |
| TMED7   | NM_181836.3 | Toll-like receptor adaptor molecule 2                                | -0.031 | 0.0055 | 72.9 |
| TMEM33  | NM_018126.1 | Transmembrane protein 33                                             | 0.423  | 0.0046 | 100  |
| TRAPPC3 | NM_014408.3 | Trafficking protein particle complex 3                               | 0.175  | 0.0058 | 78.4 |
| UBE2V2  | NM_003350.2 | Ubiquitin-conjugating enzyme E2 variant 2                            | 0.554  | 0.0037 | 81.4 |
| UCHL3   | NM_006002.3 | Ubiquitin carboxyl-terminal esterase L3 (ubiquitin thiolesterase)    | 0.530  | 0.0035 | 77.4 |
| UNC5C   | NM_003728.2 | Unc-5 homolog C (C. elegans)                                         | 0.410  | 0.0044 | 96.1 |
| USP33   | BC016663.1  | Ubiquitin specific peptidase 33                                      | 0.228  | 0.0052 | 92.2 |
| UTF1    | NM_003577.1 | Undifferentiated embryonic cell transcription factor 1               | -0.062 | 0.0047 | 77.2 |
| VPS41   | NM_014396.2 | Vacuolar protein sorting 41 homolog (S. cerevisiae)                  | -0.173 | 0.0052 | 82.9 |
| VPS45A  | NM_007259.2 | Vacuolar protein sorting 45 homolog (S. cerevisiae)                  | -0.114 | 0.0051 | 74.6 |
| WDR48   | NM_020839.2 | WD repeat domain 48                                                  | 0.180  | 0.0048 | 100  |
| WRNIP1  | NM_020135.2 | Werner helicase interacting protein 1                                | 0.350  | 0.0048 | 77.6 |
| ZNF26   | NM_019591.2 | Zinc finger protein 26                                               | 0.350  | 0.0050 | 76.3 |
| ZNF3    | NM_032924.2 | Zinc finger protein 3                                                | -0.276 | 0.0047 | 71   |
| ZNF574  | NM_022752.3 | Zinc finger protein 574                                              | -0.113 | 0.0053 | 78.2 |
| ABI1    | NM_005470.1 | Abl-interactor 1                                                     | -0.074 | 0.0046 | 66.3 |
| ACAT1   | NM_000019.2 | Acetyl-Coenzyme A acetyltransferase 1                                | 0.264  | 0.0050 | 59   |
| ADC     | NM_052998.2 | Arginine decarboxylase                                               | -0.177 | 0.0052 | 32.9 |
| ADCY6   | NM_020983.2 | Adenylate cyclase 6                                                  | 0.533  | 0.0037 | 40.2 |
| ADORA1  | NM_000674.1 | Adenosine A1 receptor                                                | -0.257 | 0.0031 | 44.2 |
| AGT     | S78530.1    | angiotensinogen                                                      | -0.285 | 0.0040 | 62.5 |
| AGTRAP  | NM_020350.3 | Angiotensin II receptor-associated protein                           | 0.150  | 0.0046 | 44.1 |
| ALB     | S69192.1    | albumin                                                              | -0.238 | 0.0048 | 59.2 |
| ALG10   | NM_032834.2 | Asparagine-linked glycosylation 10                                   | 0.391  | 0.0046 | 32.9 |
| AMH     | NM_000479.2 | Anti-Mullerian hormone                                               | -0.042 | 0.0044 | 44.1 |

|           |                |                                                           |        |        |      |
|-----------|----------------|-----------------------------------------------------------|--------|--------|------|
| AMHR2     | NM_020547.1    | Anti-Mullerian hormone receptor, type II                  | -0.049 | 0.0051 | 51.4 |
| ASPM      | NM_018136.2    | Asp (abnormal spindle) homolog, microcephaly associated   | 0.299  | 0.0052 | 63   |
| ATG2A     | NM_015104.1    | autophagy related 2 homolog A                             | -0.209 | 0.0059 | 48.3 |
| ATP2B4    | NM_001001396.1 | ATPase, Ca <sup>++</sup> transporting, plasma membrane 4  | -0.131 | 0.0055 | 51.5 |
| ATP8B2    | NM_020452.2    | ATPase, class I, type 8B, member 2                        | 0.078  | 0.0053 | 32.9 |
| AVEN      | NM_020371.2    | Apoptosis, caspase activation inhibitor                   | 0.075  | 0.0051 | 32.6 |
| B4GALT2   | NM_003780.3    | betaGlcNAc beta 1,4- galactosyltransferase, polypeptide 2 | -0.038 | 0.0051 | 36.4 |
| BCAS2     | NM_005872.2    | Breast carcinoma amplified sequence 2                     | 0.325  | 0.0051 | 40.2 |
| BCCIP     | NM_016567.2    | BRCA2 and CDKN1A interacting protein                      | 0.259  | 0.0052 | 55   |
| BCHE      | NM_000055.1    | Butyrylcholinesterase                                     | -0.022 | 0.0058 | 58.3 |
| BCL2L2    | NM_004050.2    | BCL2-like 2                                               | 0.115  | 0.0052 | 51.4 |
| BCL7B     | BC000956.2     | B-cell CLL/lymphoma 7B                                    | -0.272 | 0.0037 | 67.8 |
| BLVRB     | NM_000713.1    | Biliverdin reductase B (flavin reductase (NADPH))         | 0.337  | 0.0047 | 54.8 |
| C12orf22  | NM_030809.1    | chromosome 12 open reading frame 22                       | 0.460  | 0.0076 | 66.7 |
| C13orf1   | NM_020456.1    | Chromosome 13 open reading frame 1                        | 0.306  | 0.0032 | 48   |
| C14orf10  | NM_017917.2    | Chromosome 14 open reading frame 10                       | 0.467  | 0.0044 | 54.8 |
| C14orf138 | NM_024558.1    | Chromosome 14 open reading frame 138                      | -0.079 | 0.0065 | 44.4 |
| C14orf166 | NM_016039.1    | Chromosome 14 open reading frame 166                      | 0.437  | 0.0039 | 48   |
| C19orf6   | AK090400.1     | Chromosome 19 open reading frame 6                        | -0.046 | 0.0054 | 44.1 |
| C1orf21   | NM_030806.3    | Chromosome 1 open reading frame 21                        | -0.233 | 0.0052 | 48.1 |
| C20orf111 | NM_016470.6    | Chromosome 20 open reading frame 111                      | 0.167  | 0.0066 | 32.2 |
| C20orf23  | AB046810.2     | Chromosome 20 open reading frame 231                      | 0.447  | 0.0045 | 48.5 |
| C20orf26  | NM_015585.2    | Chromosome 20 open reading frame 26                       | -0.207 | 0.0053 | 32.6 |
| C2orf47   | NM_015955.2    | Chromosome 2 open reading frame 47                        | 0.275  | 0.0046 | 36.8 |
| C3orf26   | NM_032359.2    | Chromosome 3 open reading frame 26                        | 0.399  | 0.0049 | 40.6 |
| C6orf139  | NM_018132.3    | Chromosome 6 open reading frame 139                       | 0.063  | 0.0045 | 36.8 |
| C8orf17   | NM_020237.1    | Chromosome 8 open reading frame 17                        | 0.042  | 0.0054 | 40.4 |
| C9orf127  | NM_016446.2    | Chromosome 9 open reading frame 127                       | 0.254  | 0.0070 | 36.1 |
| C9orf156  | NM_016481.2    | Chromosome 9 open reading frame 156                       | 0.033  | 0.0049 | 54.8 |
| C9orf32   | NM_014064.2    | Chromosome 9 open reading frame 12                        | -0.028 | 0.0053 | 51.8 |
| CA4       | NM_000717.2    | Carbonic anhydrase IV                                     | -0.136 | 0.0068 | 36.8 |
| CACNA1A   | NM_023035.1    | calcium channel, voltage-dependent, P/Q type, alpha 1A    | 0.194  | 0.0046 | 62.5 |
| CAMSAP1L1 | NM_020345.1    | Calmodulin regulated spectrin-associated protein 1-like 1 | -0.049 | 0.0036 | 47.8 |
| CART      | NM_004291.2    | CART prepropeptide                                        | -0.136 | 0.0042 | 44.1 |
| CASZ1     | AK022285.1     | Castor zinc finger 1                                      | 0.030  | 0.0035 | 69.8 |
| CCDC104   | NM_080667.3    | Coiled-coil domain containing 104                         | -0.302 | 0.0060 | 58.7 |
| CCDC82    | AK027171.1     | Coiled-coil domain containing 82                          | 0.008  | 0.0055 | 36.4 |

|           |             |                                                                    |        |        |      |
|-----------|-------------|--------------------------------------------------------------------|--------|--------|------|
| CCNC      | NM_005190.2 | Cyclin C                                                           | 0.841  | 0.0034 | 52   |
| CD209     | NM_021155.2 | CD209 molecule                                                     | 0.186  | 0.0045 | 54.8 |
| CDADC1    | NM_030911.1 | Cytidine and dCMP deaminase domain containing 1                    | 0.351  | 0.0053 | 33.1 |
| CDC25C    | BC019089.2  | Cell division cycle 25 homolog C ( <i>S. pombe</i> )               | 0.453  | 0.0044 | 62.7 |
| CDC42     | BC003682.1  | Cell division cycle 42 (GTP binding protein, 25kDa)                | 0.147  | 0.0049 | 36.8 |
| CDC42BPA  | NM_014826.3 | CDC42 binding protein kinase alpha (DMPK-like)                     | -0.222 | 0.0043 | 59   |
| Cep290    | NM_025114.2 | Centrosomal protein 290kDa                                         | 0.106  | 0.0053 | 43.8 |
| CHD6      | NM_032221   | Chromodomain helicase DNA binding protein 6                        | -0.263 | 0.0052 | 59   |
| CHMP4C    | NM_152284.3 | Chromatin modifying protein 4C                                     | 0.040  | 0.0038 | 32.4 |
| CLIC1     | NM_001288.4 | Chloride intracellular channel 1                                   | 0.202  | 0.0044 | 40.4 |
| COL4A6    | D63562.2    | gene for a6(IV) collagen                                           | -0.264 | 0.0046 | 66.5 |
| CPNE6     | NM_006032.2 | Copine VI (neuronal)                                               | -0.087 | 0.0058 | 58.8 |
| CTDSP2    | NM_005730.2 | RNA polymerase II, polypeptide A small phosphatase 2               | -0.286 | 0.0050 | 40.2 |
| CTNBP1    | NM_020248.1 | Catenin, beta interacting protein 1                                | -0.170 | 0.0054 | 44.4 |
| DBI       | NM_020548.4 | Diazepam binding inhibitor                                         | 0.220  | 0.0057 | 48.3 |
| DCSH1     | NM_003737.1 | Dachsous 1 ( <i>Drosophila</i> )                                   | -0.055 | 0.0054 | 36.6 |
| DDX18     | NM_006773.3 | DEAD (Asp-Glu-Ala-Asp) box polypeptide 18                          | 0.238  | 0.0047 | 44.5 |
| DKFZP761H | NM_031297.2 | hypothetical protein DKFZp761H1710                                 | 0.009  | 0.0070 | 40.6 |
| DLL3      | NM_016941.2 | Delta-like 3 ( <i>Drosophila</i> )                                 | -0.156 | 0.0039 | 50.9 |
| DNAJA2    | NM_005880.2 | DnaJ (Hsp40) homolog, subfamily A, member 2                        | 0.202  | 0.0056 | 51.4 |
| DNAJC15   | NM_013238.1 | DnaJ (Hsp40) homolog, subfamily C, member 15                       | 0.247  | 0.0047 | 54.8 |
| DOK6      | NM_152721.2 | Docking protein 6                                                  | -0.139 | 0.0053 | 51.9 |
| DPH5      | NM_015958.1 | DPH5 homolog ( <i>S. cerevisiae</i> )                              | 0.226  | 0.0054 | 40.2 |
| DPM1      | NM_003859.1 | Dolichyl-phosphate mannosyltransferase polypeptide 1               | 0.336  | 0.0041 | 51.8 |
| DPP3      | NM_005700.2 | Dipeptidyl-peptidase 3                                             | 0.089  | 0.0071 | 47.8 |
| EAN57     | Y11142.1    | EAN57 gene                                                         | -0.320 | 0.0040 | 40.2 |
| EIF2S1    | NM_004094.3 | Eukaryotic translation initiation factor 2, subunit 1 alpha, 35kDa | 0.505  | 0.0046 | 44.4 |
| EPHX1     | NM_000120.2 | Epoxide hydrolase 1, microsomal (xenobiotic)                       | -0.411 | 0.0047 | 54.8 |
| EVL       | NM_016337.2 | Enah/Vasp-like                                                     | -0.224 | 0.0044 | 44.6 |
| EXOC1     | NM_018261.2 | Exocyst complex component 1                                        | 0.083  | 0.0055 | 44.1 |
| EXOC3L2   | NM_138568.2 | exocyst complex component 3-like 2                                 | -0.279 | 0.0620 | 63.9 |
| FAIM3     | NM_005449.3 | Fas apoptotic inhibitory molecule                                  | -0.051 | 0.0050 | 40.6 |
| FAM39CP   | NG_003159.1 | family with sequence similarity 39, member C                       | -0.071 | 0.0025 | 66   |
| FAM89A    | NM_198552.1 | Family with sequence similarity 89, member A                       | 0.044  | 0.0053 | 54.8 |
| FBXO4     | NM_033484.1 | F-box protein 4                                                    | -0.051 | 0.0045 | 36.4 |
| FLJ11235  | AK002097.1  | Hypothetical FLJ11235                                              | -0.162 | 0.0027 | 32.9 |
| FOLH1     | AF107214.1  | Folate hydrolase 1                                                 | -0.152 | 0.0044 | 40.2 |

|           |                |                                                          |        |        |      |
|-----------|----------------|----------------------------------------------------------|--------|--------|------|
| FOXL2     | NM_023067.2    | Forkhead box L2                                          | 0.006  | 0.0055 | 32.9 |
| G3BP1     | NM_005754.2    | GTPase activating protein (SH3 domain) binding protein 1 | 0.214  | 0.0087 | 48   |
| GABARAPL1 | AF287012.1     | GABA(A) receptor-associated protein like 1               | -0.225 | 0.0047 | 63.9 |
| GABARAPL2 | NM_007285.6    | GABA(A) receptor-associated protein-like 2               | 0.223  | 0.0090 | 62.3 |
| GADD45G   | NM_006705.2    | Growth arrest and DNA-damage-inducible, gamma            | -0.209 | 0.0038 | 32.6 |
| GAPDHS    | NM_014364.3    | Glyceraldehyde-3-phosphate dehydrogenase, spermatogenic  | 0.038  | 0.0058 | 40.6 |
| GAS2L1    | BC001782.1     | Growth arrest-specific 2 like 1                          | 0.419  | 0.0048 | 44.6 |
| GBA2      | AK057610.1     | Glucosidase, beta (bile acid) 2                          | -0.238 | 0.0046 | 62.5 |
| GEC1      | AF287012.1     | early estrogen-regulated protein                         | -0.296 | 0.0085 | 63.9 |
| GFI1      | NM_005263.2    | elongation factor G, mitochondrial1                      | -0.015 | 0.0052 | 48.1 |
| GLDC      | NM_000170.1    | Glycine dehydrogenase (decarboxylating)                  | 0.224  | 0.0045 | 44.1 |
| GLTP      | NM_016433.3    | Nuclear receptor binding protein 1                       | 0.175  | 0.0042 | 33.1 |
| GMIP      | NM_016573.1    | GEM interacting protein                                  | -0.037 | 0.0059 | 36.8 |
| GPR51     | NM_005458.5    | Golgin A5                                                | 0.151  | 0.0037 | 68.8 |
| GRINA     | U44954.1       | receptor glutamate-binding chain                         | -0.233 | 0.0072 | 62.3 |
| HCCS      | NM_005333.1    | Holocytochrome c synthase (cytochrome c heme-lyase)      | 0.446  | 0.0039 | 63   |
| HHLA3     | NM_001031693.1 | dolichyl-phosphate mannosyltransferase polypeptide 1     | -0.154 | 0.0055 | 51.8 |
| HKR3      | NM_005341.1    | HERV-H LTR-associating 3                                 | 0.000  | 0.0091 | 36.4 |
| HOXB9     | NM_024017.3    | Homeobox B9                                              | -0.126 | 0.0048 | 55   |
| HPRT1     | NM_000194.1    | Hypoxanthine phosphoribosyltransferase 1                 | 0.452  | 0.0046 | 60.2 |
| HTRA2     | NM_013247.3    | HtrA serine peptidase 2                                  | 0.189  | 0.0050 | 36.8 |
| INSR      | NM_000208.1    | Insulin receptor                                         | -0.090 | 0.0056 | 32.9 |
| ISOC1     | BC014105.2     | Isochorismatase domain containing 1                      | -0.207 | 0.0050 | 66.4 |
| ITFG2     | NM_018463.2    | integrin alpha FG-GAP repeat containing 2                | -0.143 | 0.0043 | 69.8 |
| ITM2C     | BC098563.1     | Integral membrane protein 2C                             | -0.210 | 0.0051 | 36.4 |
| ITPKB     | NM_002221.2    | Inositol 1,4,5-trisphosphate 3-kinase B                  | 0.022  | 0.0044 | 62.8 |
| JUB       | BC034968.2     | Jub, ajuba homolog (Xenopus laevis)                      | -0.040 | 0.0057 | 44.1 |
| KATNB1    | NM_005886.1    | Katanin p80 (WD repeat containing) subunit B 1           | 0.317  | 0.0055 | 32.9 |
| KIAA0513  | NM_014732.2    | KIAA0513                                                 | -0.271 | 0.0031 | 40.6 |
| KIAA1442  | XM_044921.5    | KIAA1442                                                 | 0.440  | 0.0078 | 44.5 |
| KIAA1843  | AK027583.1     | KIAA1843                                                 | 0.396  | 0.0058 | 36.8 |
| KLK8      | NM_144505.1    | Kallikrein-related peptidase 8                           | -0.236 | 0.0046 | 44.1 |
| KLRC2     | NM_002260.2    | Killer cell lectin-like receptor subfamily C, member 2   | 0.263  | 0.0049 | 44.2 |
| KRTHA1    | NM_002277.2    | Keratin 31                                               | -0.058 | 0.0043 | 62.5 |
| KRTHA4    | NM_021013.3    | Keratin 34                                               | 0.271  | 0.0051 | 59.2 |
| LEPROTL1  | NM_015344.1    | Leptin receptor overlapping transcript-like 1            | 0.422  | 0.0044 | 62.8 |
| LILRP2    | NM_024317      | leukocyte immunoglobulin-like receptor pseudogene 2      | -0.183 | 0.0056 | 51.4 |

|          |             |                                                            |        |        |      |
|----------|-------------|------------------------------------------------------------|--------|--------|------|
| LOC57228 | NM_020467.2 | small trans-membrane and glycosylated protein              | 0.152  | 0.0064 | 48   |
| LOC81691 | NM_030941.1 | Exonuclease NEF-sp                                         | 0.206  | 0.0051 | 36.2 |
| LRRC46   | AK027206.1  | Leucine rich repeat containing 46                          | -0.077 | 0.0051 | 40.6 |
| LSM2     | NM_021177.3 | LSM2 homolog, U6 small nuclear RNA associated              | 0.197  | 0.0055 | 36.8 |
| LTA      | NM_000595.2 | Lymphotoxin alpha (TNF superfamily, member 1)              | 0.052  | 0.0049 | 48   |
| LTBR     | NM_002342.1 | Lymphotoxin beta receptor (TNFR superfamily, member 3)     | -0.025 | 0.0051 | 32.6 |
| MAGED2   | U92544.1    | Melanoma antigen family D, 2                               | -0.355 | 0.0041 | 36.8 |
| MAPK10   | BC022492.1  | mitogen-activated protein kinase 10                        | -0.263 | 0.0070 | 51.5 |
| MDM1     | NM_017440.2 | Mdm1 nuclear protein homolog (mouse)                       | -0.292 | 0.0059 | 40.4 |
| MED28    | NM_025205.3 | Mediator complex subunit 28                                | 0.260  | 0.0039 | 32.9 |
| MGST1    | NM_020300.3 | Microsomal glutathione S-transferase 1                     | 0.037  | 0.0039 | 36.8 |
| MOCS1    | AY423726.1  | Molybdenum cofactor synthesis 1                            | -0.190 | 0.0042 | 66.5 |
| MOG      | BC035938.1  | Homo sapiens myelin oligodendrocyte glycoprotein           | -0.075 | 0.0039 | 54.5 |
| MORF4L1  | NM_006791.2 | Mortality factor 4 like 1                                  | 0.142  | 0.0055 | 36.8 |
| MRLC2    | NM_033546.2 | myosin regulatory light chain                              | -0.217 | 0.0072 | 68.6 |
| MRPL14   | NM_032111.2 | Mitochondrial ribosomal protein L14                        | 0.266  | 0.0044 | 59   |
| MRPL18   | NM_014161.2 | Mitochondrial ribosomal protein L18                        | 0.168  | 0.0050 | 62.5 |
| MRPL43   | NM_032112.2 | Mitochondrial ribosomal protein L43                        | 0.098  | 0.0056 | 40.2 |
| MRPL44   | NM_022915.2 | Mitochondrial ribosomal protein L44                        | 0.308  | 0.0036 | 59   |
| MST1     | NM_020998.2 | Macrophage stimulating 1 (hepatocyte growth factor-like)   | -0.249 | 0.0039 | 44.5 |
| MTMR2    | BC052990.1  | Methylenetetrahydrofolate dehydrogenase 2                  | 0.396  | 0.0041 | 44.5 |
| MTX2     | NM_006554.3 | Metaxin                                                    | 0.345  | 0.0055 | 32.6 |
| MUC1     | Z17325.1    | Mucin 1, cell surface associated                           | 0.007  | 0.0051 | 63   |
| MUC4     | AF058803.1  | Mucin 4, cell surface associated                           | 0.144  | 0.0044 | 40.2 |
| MYCBP2   | AF083244.1  | MYC binding protein 2                                      | 0.117  | 0.0041 | 32.2 |
| MYO10    | AB018342.2  | Myosin X                                                   | -0.139 | 0.0057 | 36.8 |
| MYOT     | NM_006790.1 | myotilin                                                   | 0.219  | 0.0056 | 40.6 |
| NCOR2    | NM_006312.2 | Nuclear receptor co-repressor 2                            | -0.086 | 0.0064 | 36.4 |
| NDUFS8   | NM_002496.1 | NADH dehydrogenase (ubiquinone) Fe-S protein 8             | 0.013  | 0.0052 | 32.9 |
| NFIL3    | NM_005384.2 | Nuclear factor, interleukin 3 regulated                    | 0.725  | 0.0044 | 60   |
| NHLH2    | AK056621.1  | nescient helix loop helix 2                                | 0.021  | 0.0062 | 51.8 |
| NIF3L1   | NM_021824.2 | NIF3 NGG1 interacting factor 3-like 1 (S. pombe)           | 0.339  | 0.0052 | 66.8 |
| NONO     | NM_007363.3 | non-POU domain containing, octamer-binding                 | 0.219  | 0.0085 | 48.5 |
| NRXN3    | AJ493127.1  | Homo sapiens partial mRNA for neurexin 3-beta (NRXN3 gene) | -0.275 | 0.0048 | 63   |
| NUBPL    | NM_025152.1 | nucleotide binding protein-like                            | 0.187  | 0.0062 | 44.1 |
| OAS1     | NM_002534.1 | Nucleotide binding protein-like                            | 0.037  | 0.0038 | 69.2 |
| PAAF1    | NM_025155.1 | proteasomal ATPase-associated factor 1                     | 0.291  | 0.0074 | 47.1 |



|           |             |                                                              |        |        |      |
|-----------|-------------|--------------------------------------------------------------|--------|--------|------|
| PAMCI     | NM_005447.2 | peptidylglycine alpha-amidating monooxygenase interactor     | 0.108  | 0.0052 | 54.8 |
| PANK2     | NM_024960.3 | Pantothenate kinase 2                                        | 0.203  | 0.0055 | 51.8 |
| PDCD10    | NM_007217.3 | Programmed cell death 10                                     | 0.528  | 0.0049 | 60   |
| PDCD7     | NM_005707.1 | Programmed cell death 7                                      | -0.324 | 0.0062 | 40.2 |
| PDE4C     | NM_000923.1 | Phosphodiesterase 4C, cAMP-specific                          | -0.117 | 0.0046 | 32.4 |
| PDHA1     | NM_000284.1 | pyruvate dehydrogenase alpha 1, variant 1                    | 0.204  | 0.0071 | 36.8 |
| PHACS     | NM_032592.1 | 1-aminocyclopropane-1-carboxylate synthase                   | 0.243  | 0.0042 | 32.9 |
| PKNOX2    | BC045626.1  | PBX/knotted 1 homeobox 2                                     | -0.218 | 0.0051 | 51.1 |
| PLD2      | NM_002663.2 | Phospholipase D2                                             | -0.204 | 0.0050 | 62.6 |
| PLP2      | NM_002668.1 | Proteolipid protein 2 (colonic epithelium-enriched)          | 0.052  | 0.0058 | 66.5 |
| PLSCR1    | NM_021105.1 | Phospholipid scramblase 1                                    | -0.159 | 0.0053 | 51.9 |
| POU2F1    | NM_002697.2 | POU class 2 homeobox 1                                       | -0.223 | 0.0037 | 44.9 |
| PRAM1     | NM_032152.3 | PML-RARA regulated adaptor molecule 1                        | -0.142 | 0.0050 | 60.6 |
| PRPF4B    | NM_003913.3 | PRP4 pre-mRNA processing factor 4 homolog B (yeast)          | 0.203  | 0.0050 | 51.4 |
| PTS       | NM_000317.1 | 6-pyruvoyltetrahydropterin synthase                          | 0.314  | 0.0054 | 48.6 |
| PVRIG     | NM_024070.3 | poliovirus receptor related immunoglobulin domain containing | 0.177  | 0.0080 | 54.8 |
| RAB11FIP1 | AK124422.1  | RAB11 family interacting protein 1                           | 0.307  | 0.0053 | 54.8 |
| RAB32     | NM_006834.2 | RAB32, member RAS oncogene family                            | 0.308  | 0.0047 | 58.8 |
| RERG      | NM_032918.1 | RAS-like, estrogen-regulated, growth inhibitor               | 0.200  | 0.0057 | 50   |
| RFX5      | NM_000449.2 | Regulatory factor X, 5 (influences HLA class II expression)  | -0.017 | 0.0065 | 32.9 |
| RGS3      | NM_017790.2 | Regulator of G-protein signaling 3                           | -0.059 | 0.0044 | 36.4 |
| RHBG      | NM_020407.1 | Rh family, B glycoprotein (gene/pseudogene)                  | -0.045 | 0.0045 | 54.8 |
| RHEB      | NM_005614.2 | Ras homolog enriched in brain                                | 0.294  | 0.0049 | 40.6 |
| RNASEH2A  | NM_006397.2 | Ribonuclease H2, subunit A                                   | 0.615  | 0.0057 | 40.6 |
| RPS3      | NM_001005.2 | ribosomal protein S3                                         | 0.102  | 0.0044 | 48.3 |
| RSAFD1    | NM_018264.2 | tRNA-yW synthesizing protein 1 homolog                       | -0.109 | 0.0084 | 48.5 |
| SAC3D1    | NM_013299.2 | SAC3 domain containing 1                                     | 0.426  | 0.0036 | 32.6 |
| SCRN3     | NM_024583.2 | Secernin 3                                                   | 0.087  | 0.0054 | 67.1 |
| SDF4      | NM_016176.2 | Stromal cell derived factor 4                                | -0.326 | 0.0051 | 60.6 |
| SEC22     | NM_004206.2 | vesicle trafficking protein homolog C transcript variant 2   | 0.321  | 0.0082 | 44.1 |
| SERAC1    | NM_032861.2 | Serine active site containing 1                              | -0.124 | 0.0093 | 56.9 |
| SF3B1     | NM_012433.2 | splicing factor 3b, subunit 1                                | 0.347  | 0.0075 | 44.5 |
| SF3B14    | NM_016047.3 | Splicing factor 3B, 14 kDa subunit                           | 0.365  | 0.0046 | 44.5 |
| SH3BP2    | NM.003023   | SH3-domain binding protein 2                                 | -0.179 | 0.0055 | 62.5 |
| SH3GL1    | NM_003025.2 | SH3-domain GRB2-like 1                                       | -0.108 | 0.0057 | 54.8 |
| SKP2      | NM_032637.2 | S-phase kinase-associated protein 2 (p45)                    | 0.236  | 0.0045 | 36.4 |
| SLAMF7    | NM_021181.3 | SLAM family member 7                                         | -0.087 | 0.0054 | 51.4 |

|           |             |                                                            |        |        |      |
|-----------|-------------|------------------------------------------------------------|--------|--------|------|
| SLC19A1   | S78996.1    | Solute carrier family 19 (folate transporter), member 1    | -0.163 | 0.0039 | 59   |
| SLC20A1   | NM_005415.3 | Solute carrier family 20 (phosphate transporter), member 1 | 0.391  | 0.0052 | 40.6 |
| SLC25A36  | NM_018155.1 | Solute carrier family 25, member 36                        | 0.298  | 0.0058 | 48   |
| SLC43A3   | AL157431.1  | Solute carrier family 43, member 3                         | -0.313 | 0.0037 | 55   |
| SMS       | NM_004595.2 | Spermine synthase                                          | 0.237  | 0.0048 | 40.9 |
| SNAPC1    | NM_003082.2 | Small nuclear RNA activating complex, polypeptide 1, 43kDa | 0.440  | 0.0050 | 58.7 |
| SOD3      | NM_003102.1 | Superoxide dismutase 3, extracellular                      | -0.437 | 0.0040 | 61.2 |
| SOX4      | NM_003107.2 | SRY (sex determining region Y)-box 4                       | -0.175 | 0.0030 | 58.6 |
| SPI1      | NM_003120.1 | Spleen focus forming virus proviral integration oncogene   | 0.317  | 0.0052 | 62.4 |
| SPOP      | NM_003563.3 | Speckle-type POZ protein                                   | -0.220 | 0.0045 | 62.8 |
| SPP2      | NM_006944.2 | Secreted phosphoprotein 2, 24kDa                           | 0.194  | 0.0048 | 66.8 |
| SRPRB     | NM_021203.2 | Signal recognition particle receptor, B subunit            | 0.058  | 0.0055 | 48.3 |
| STAG2     | NM_006603.3 | Stromal antigen 2                                          | 0.418  | 0.0034 | 37   |
| STAT5A    | NM_003152.2 | Signal transducer and activator of transcription 5A        | -0.250 | 0.0052 | 48   |
| STOM      | NM_004099.4 | Stomatin                                                   | -0.201 | 0.0054 | 36.4 |
| SURF5     | BC024225.2  | Surfeit 5                                                  | -0.471 | 0.0063 | 58.8 |
| SYNE1     | NM_015293.1 | Spectrin repeat containing, nuclear envelope 1             | -0.200 | 0.0053 | 36.6 |
| TANC2     | NM_015623   | putative ankyrin-repeat containing protein                 | 0.286  | 0.0045 | 40.2 |
| TCP1      | X52882.1    | t-complex polypeptide 1                                    | 0.358  | 0.0053 | 49   |
| TFB2M     | NM_022366.1 | Transcription factor B2, mitochondrial                     | 0.230  | 0.0052 | 44.4 |
| TIMM9     | NM_012460.2 | Translocase of inner mitochondrial membrane 9 homolog      | 0.309  | 0.0047 | 48   |
| TMED5     | NM_016040.3 | Transmembrane emp24 protein transport domain containing 5  | 0.265  | 0.0047 | 55.9 |
| TMEM14B   | NM_030969.2 | Transmembrane protein 14B                                  | 0.612  | 0.0490 | 37.2 |
| TMEM159   | NM_020422.3 | transmembrane protein 159                                  | 0.267  | 0.0052 | 63.4 |
| TMEM59    | NM_004872.3 | Transmembrane protein 59                                   | 0.194  | 0.0055 | 32.9 |
| TMEM87B   | U60873.1    | transmembrane protein 87B                                  | -0.036 | 0.0048 | 62.8 |
| TNEM111   | NM_018447.1 | transmembrane protein 111                                  | 0.031  | 0.0048 | 36.8 |
| TNFRSF11A | NM_003839.2 | Tumor necrosis factor receptor superfamily, member 11a     | -0.329 | 0.0052 | 66   |
| TNPO1     | NM_002270.2 | Transportin 1                                              | 0.329  | 0.0038 | 58.7 |
| TOPORS    | NM_005802.2 | Topoisomerase I binding, arginine/serine-rich              | 0.385  | 0.0048 | 51.8 |
| TOR1A     | NM_000113.2 | Torsin family 1, member A (torsin A)                       | 0.264  | 0.0031 | 62.2 |
| TOR3A     | AJ299441.1  | Torsin family 3, member A                                  | -0.236 | 0.0056 | 55.2 |
| TPSG1     | NM_012467.1 | Tryptase gamma 1                                           | -0.204 | 0.0053 | 58.3 |
| TXNDC12   | NM_015913.2 | Thioredoxin domain containing 12 (endoplasmic reticulum)   | 0.110  | 0.0062 | 40.6 |
| UBA52     | NM_003333.2 | Ubiquitin A-52 residue ribosomal protein fusion product 1  | -0.196 | 0.0033 | 67.1 |
| UCK2      | NM_012474.3 | Uridine-cytidine kinase 2                                  | 0.277  | 0.0049 | 44.9 |
| USP25     | NM_013396.3 | Ubiquitin specific peptidase 25                            | 0.055  | 0.0050 | 32.6 |

|         |             |                                                                |        |        |      |
|---------|-------------|----------------------------------------------------------------|--------|--------|------|
| USP5    | BC005139.2  | Ubiquitin specific peptidase 5 (isopeptidase T)                | -0.124 | 0.0044 | 58.7 |
| VAMP3   | NM_004781.3 | Homo sapiens vesicle-associated membrane protein 3             | 0.312  | 0.0049 | 58.8 |
| VDAC2   | NM_003375.2 | Voltage-dependent anion channel 2                              | 0.380  | 0.0041 | 66.8 |
| VPS13A  | AJ608769.1  | Vacuolar protein sorting 13 homolog A ( <i>S. cerevisiae</i> ) | 0.018  | 0.0055 | 62.5 |
| VPS16   | NM_022575.2 | Protein tyrosine phosphatase, receptor type, A                 | 0.119  | 0.0062 | 51.4 |
| VPS18   | NM_020857.2 | Vacuolar protein sorting 18 homolog ( <i>S. cerevisiae</i> )   | -0.126 | 0.0037 | 66.3 |
| WDR5B   | NM_019069.3 | WD repeat domain 5B                                            | 0.164  | 0.0050 | 54.8 |
| WDR74   | NM_018093.1 | WD repeat domain 74                                            | 0.150  | 0.0059 | 36.8 |
| WHSC1   | AB029013.1  | Wolf-Hirschhorn syndrome candidate 1                           | -0.100 | 0.0042 | 51.4 |
| WHSC1L1 | NM_023034.1 | Wolf-Hirschhorn syndrome candidate 1-like 1                    | 0.180  | 0.0034 | 44.5 |
| WIPI2   | BC021068.1  | WD repeat domain, phosphoinositide interacting 2               | -0.196 | 0.0040 | 48   |
| WNK3    | AY352048.1  | WNK lysine deficient protein kinase 3                          | -0.221 | 0.0051 | 62.5 |
| WWOX    | AY256821.1  | WW domain containing oxidoreductase                            | -0.098 | 0.0053 | 32.9 |
| XIAP    | NM_001167.2 | X-linked inhibitor of apoptosis                                | 0.076  | 0.0048 | 51.5 |
| XYLT2   | NM_022167.1 | Xylosyltransferase II                                          | 0.090  | 0.0035 | 40.2 |
| YWHAB   | AF107406.1  | Tyrosine 3-/tryptophan 5-monoxygenase activation protein       | -0.031 | 0.0050 | 32.9 |
| ZBTB4   | NM_020899.2 | Zinc finger and BTB domain containing 4                        | -0.057 | 0.0037 | 69.8 |
| ZCWPW1  | NM_017984.2 | Zinc finger, CW type with PWWP domain 1                        | -0.246 | 0.0050 | 50.9 |
| ZDHHC17 | AB023163.1  | Zinc finger, DHHC-type containing 17                           | -0.313 | 0.0045 | 36.4 |
| ZMYM2   | BC036372.1  | Zinc finger, MYM-type 2                                        | -0.550 | 0.0040 | 63   |
| ZNF34   | NM_030580.2 | Zinc finger protein 34                                         | -0.024 | 0.0060 | 66.1 |
| ZNF587  | NM_017961   | Zinc finger protein 587                                        | 0.175  | 0.0049 | 32.9 |
|         | AK025047.1  |                                                                | 0.331  | 0.0068 | 62.3 |
|         | AK021678.1  |                                                                | 0.134  | 0.0093 | 58.3 |
|         | AL136582.1  | DKFZp761N1924                                                  | -0.536 | 0.0080 | 55.2 |
|         | X74025.1    |                                                                | -0.620 | 0.0073 | 55   |
|         | LOC63426    |                                                                | -0.145 | 0.0103 | 54.8 |
|         | AC012543.4  |                                                                | 0.638  | 0.0064 | 51.8 |
|         | BC018638.2  |                                                                | -0.316 | 0.0090 | 51.4 |
|         | AC037459.16 |                                                                | -0.177 | 0.0069 | 51.4 |
|         | AC016757.10 |                                                                | -0.589 | 0.0069 | 48.3 |
|         | AC016757.10 |                                                                | 0.497  | 0.0079 | 48.1 |
|         | AL365410.1  |                                                                | -0.26  | 0.0075 | 44.4 |
|         | Z99916.1    |                                                                | -0.317 | 0.0069 | 43.8 |
|         | BK001591.1  |                                                                | -0.315 | 0.0073 | 43.8 |
|         | AL360271.12 |                                                                | -0.175 | 0.0085 | 40.6 |
|         | AF336885.1  |                                                                | -0.224 | 0.0082 | 40.6 |

|             |          |        |        |      |
|-------------|----------|--------|--------|------|
| NM_014732.2 | KIAA0513 | -0.338 | 0.0067 | 40.6 |
| AC015908.10 |          | -0.146 | 0.0055 | 40.2 |
| AC015804.14 |          | 0.125  | 0.0070 | 39.9 |
| AL121761.5  |          | 0.240  | 0.0055 | 39.9 |
| BC052779.1  |          | -0.191 | 0.0086 | 36.8 |
| AK027583.1  |          | -0.396 | 0.0058 | 36.8 |
| AK027583.1  |          | 0.06   | 0.0091 | 36.8 |
| AC092057.2  |          | -0.24  | 0.0077 | 36.8 |
| AC009153.10 |          | -0.064 | 0.0091 | 36.8 |
| AF130063.1  |          | -0.51  | 0.0059 | 36.8 |
| AF130066.1  |          | -0.275 | 0.0074 | 36.8 |
| AK027198.1  |          | 0.096  | 0.0076 | 36.4 |
| AC025270.6  |          | -0.32  | 0.0074 | 32.6 |

#### Supp Table 4
