# Supplementary material
Source: PubMed Central journal article supplement (PMC3314285)

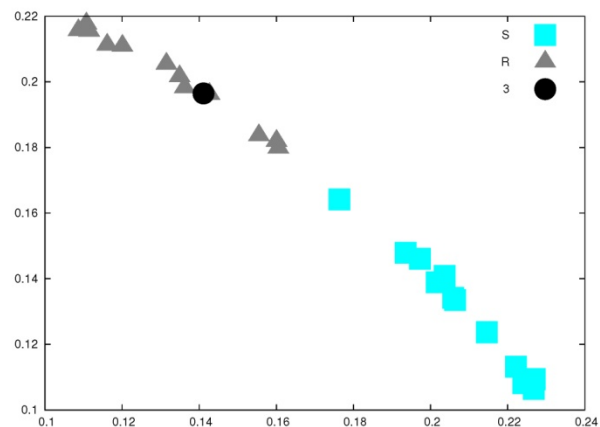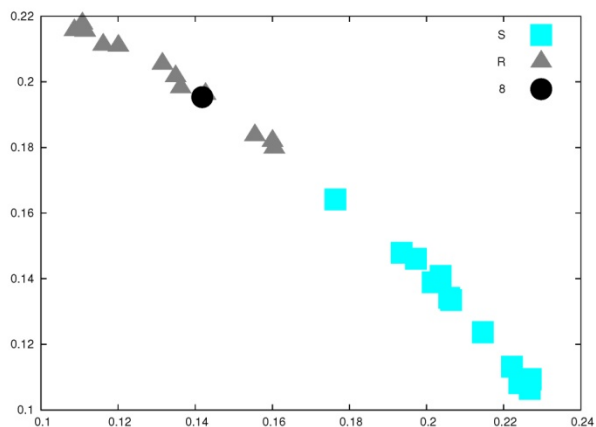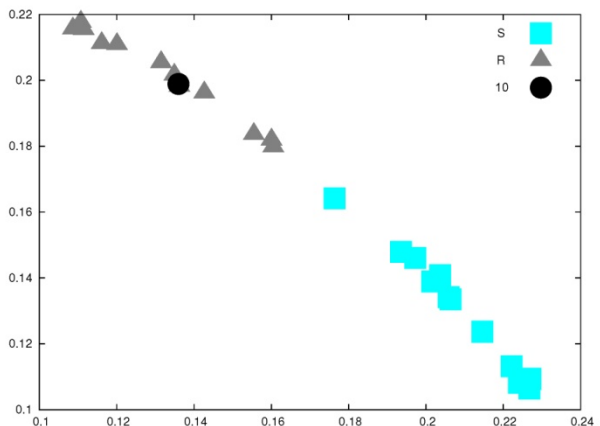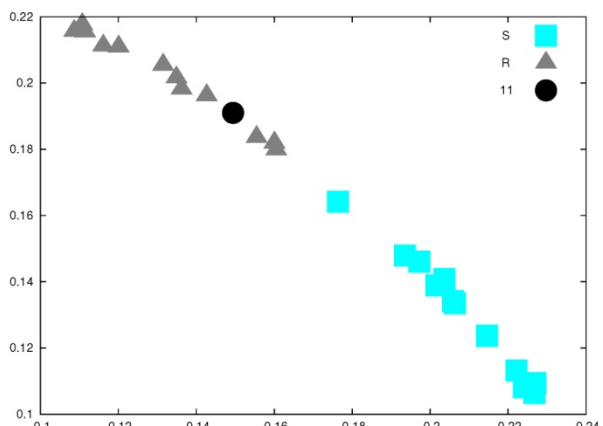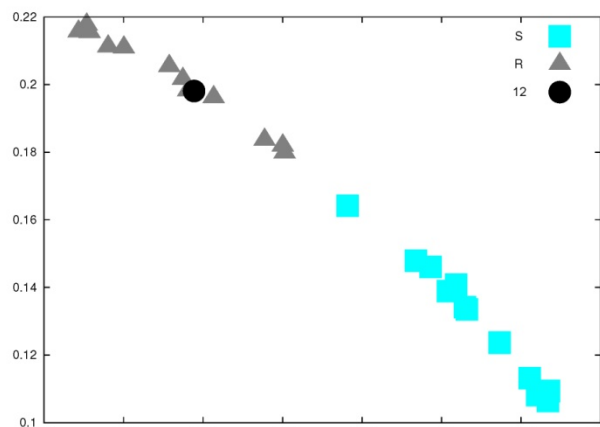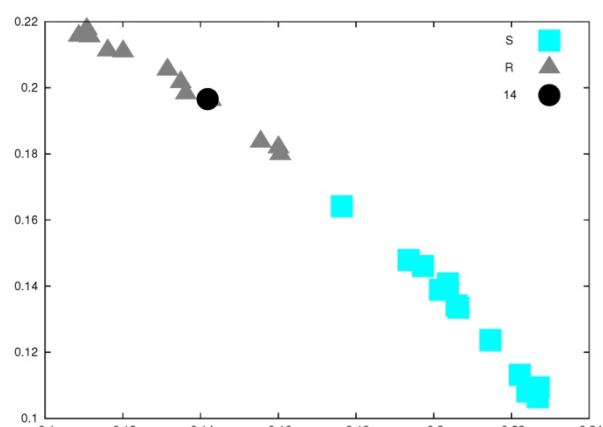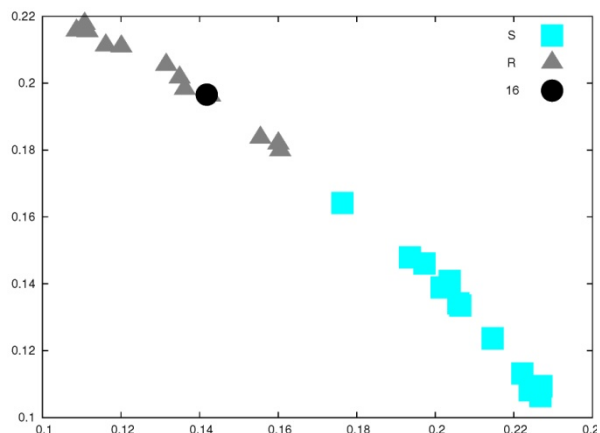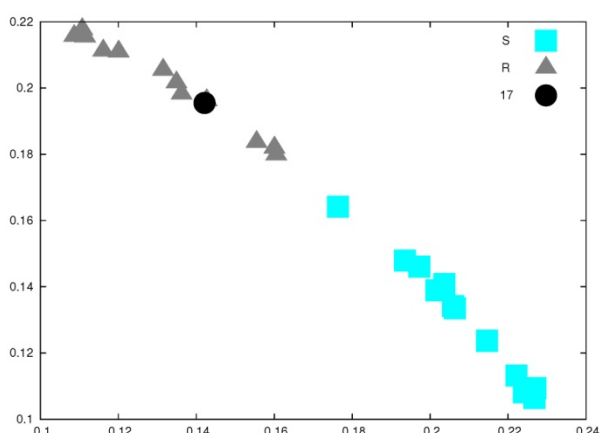

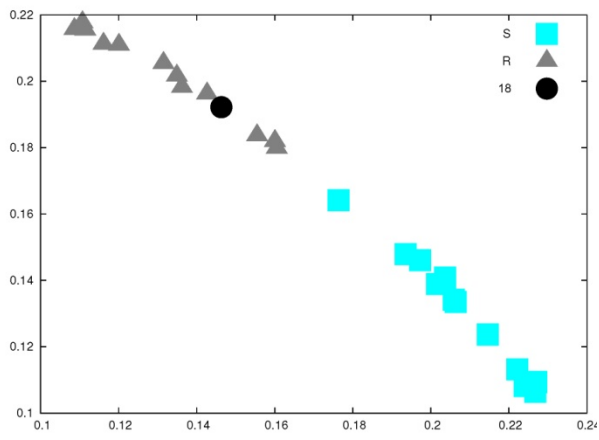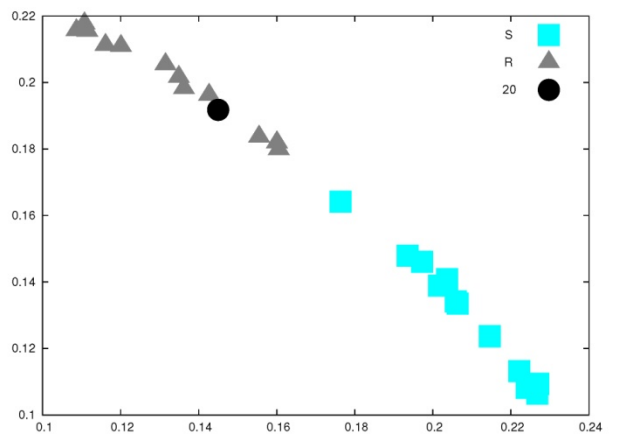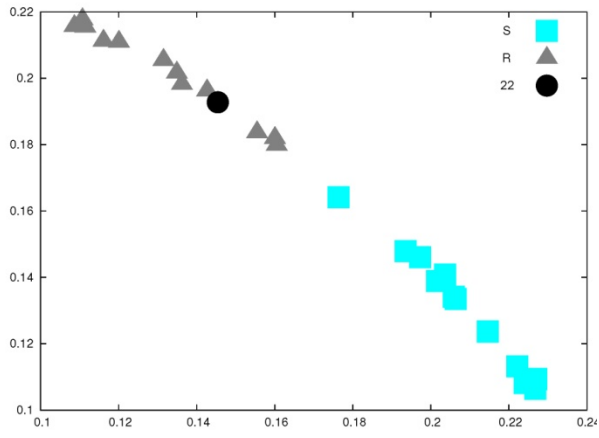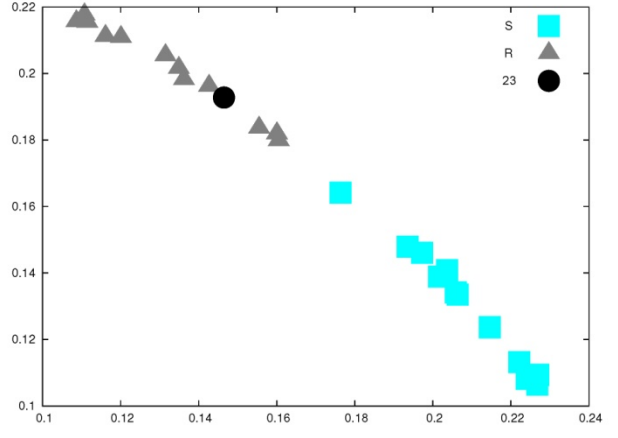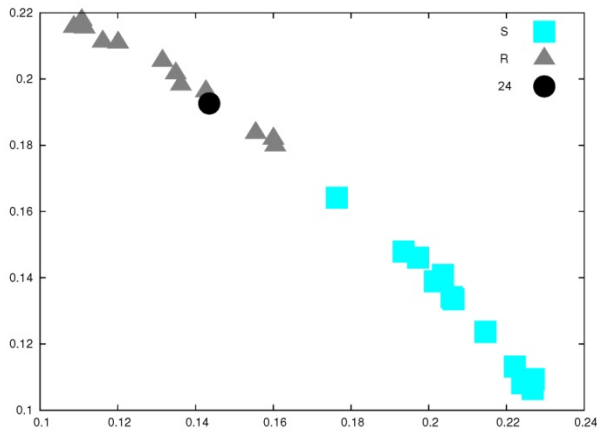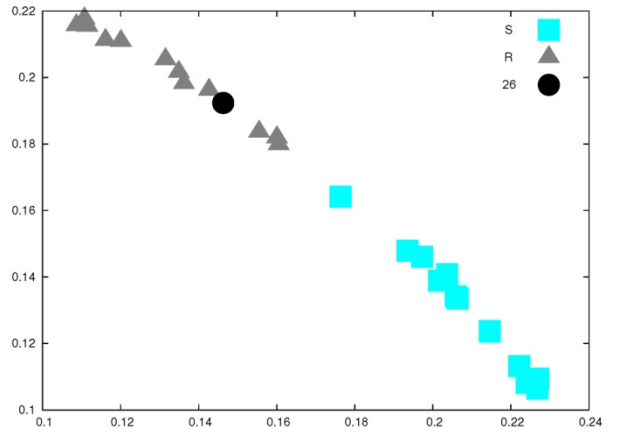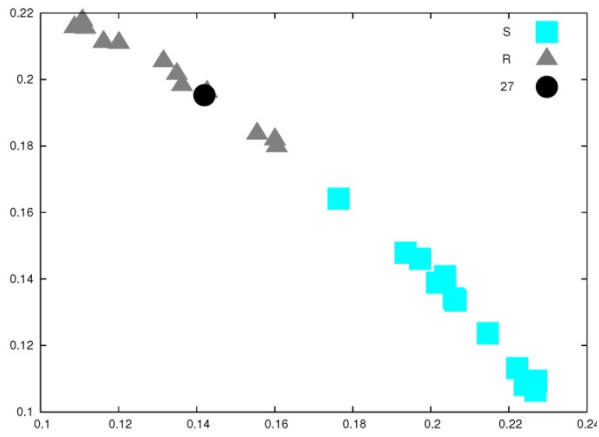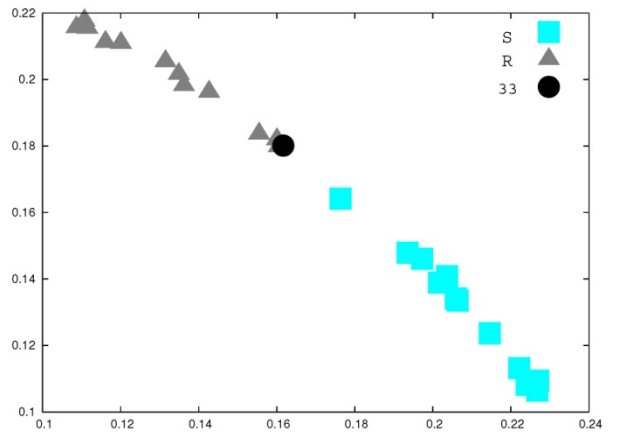



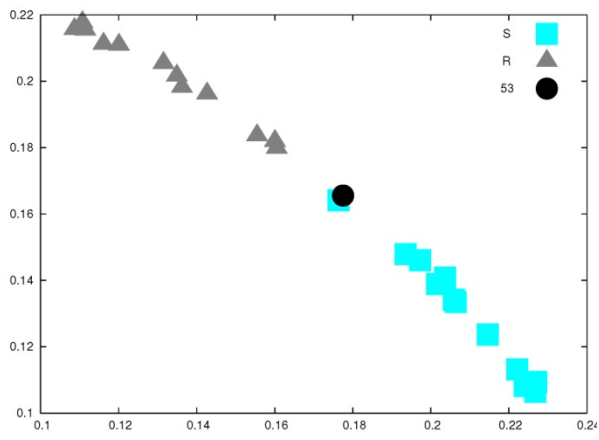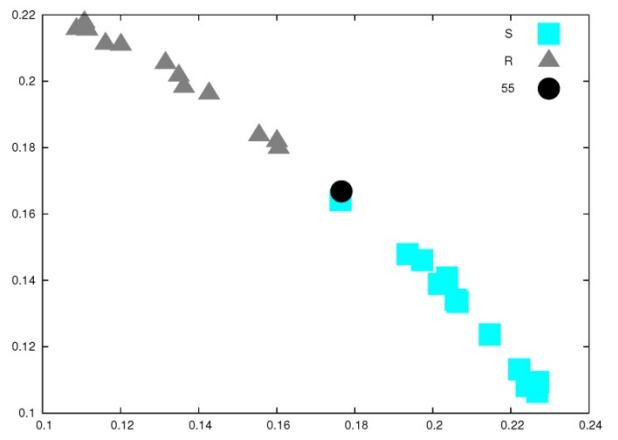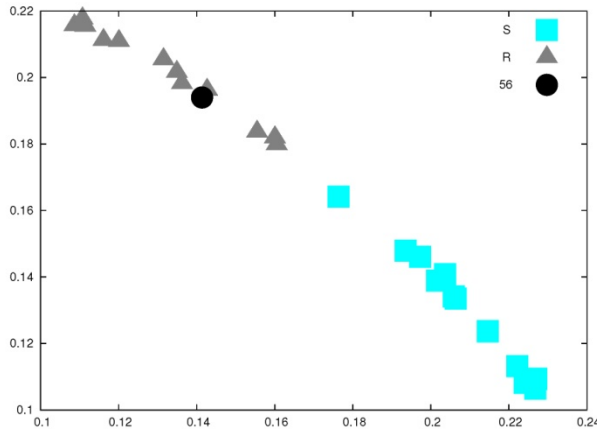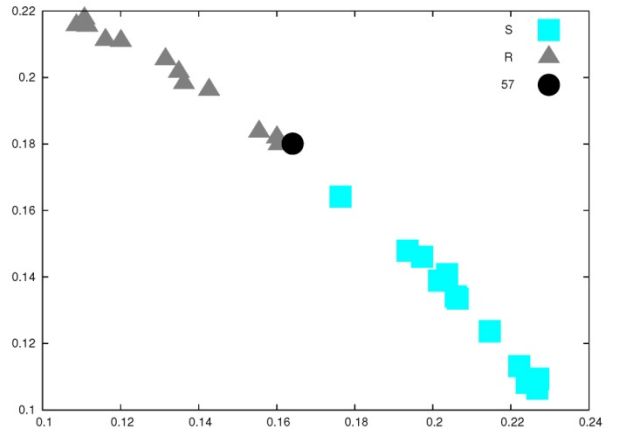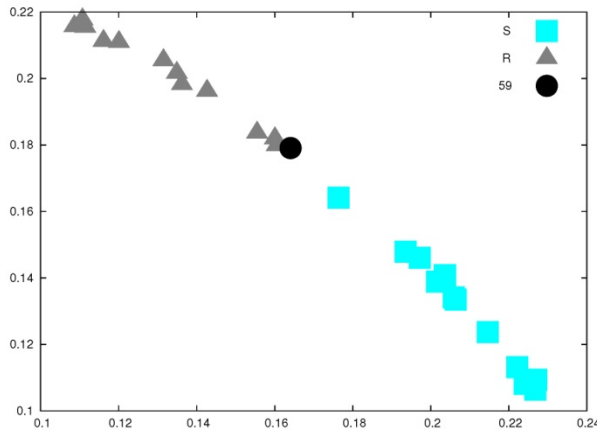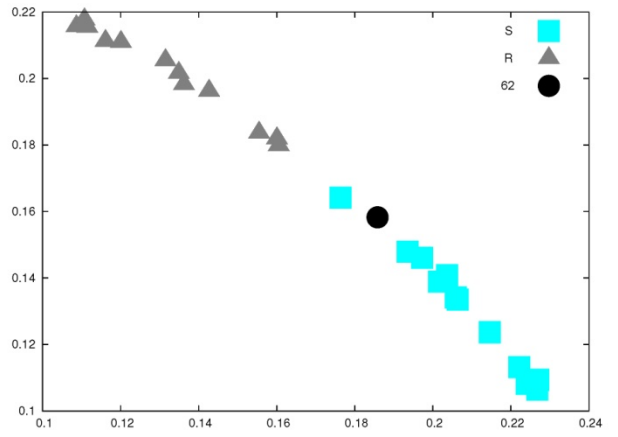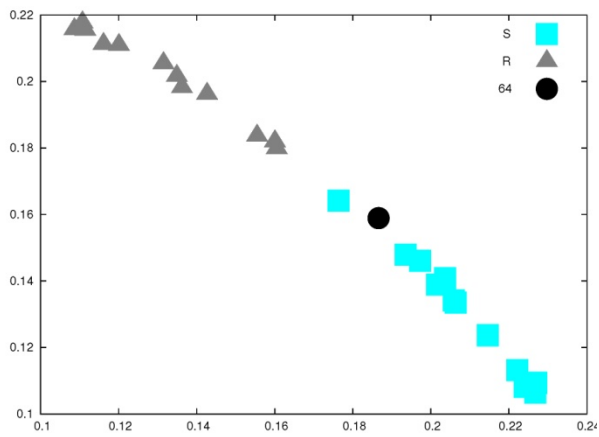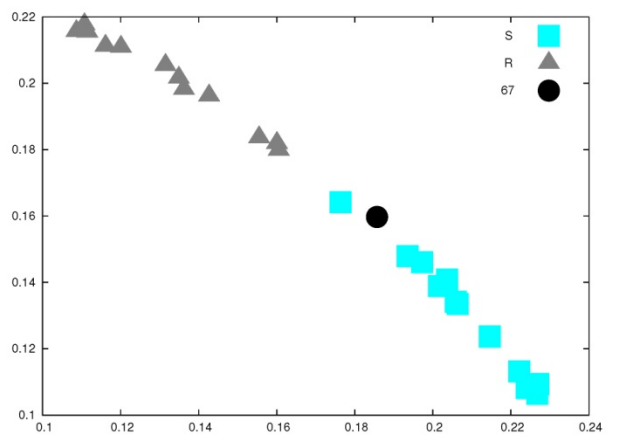

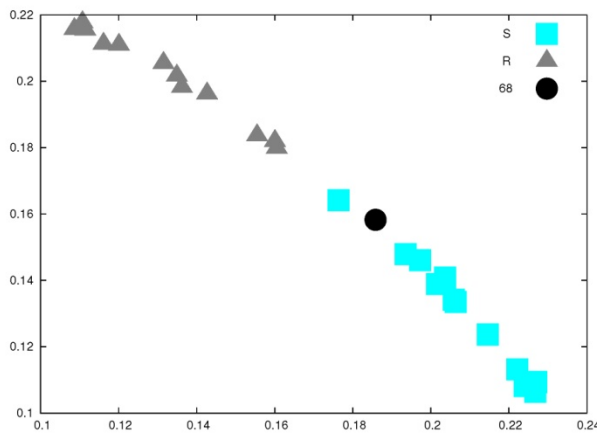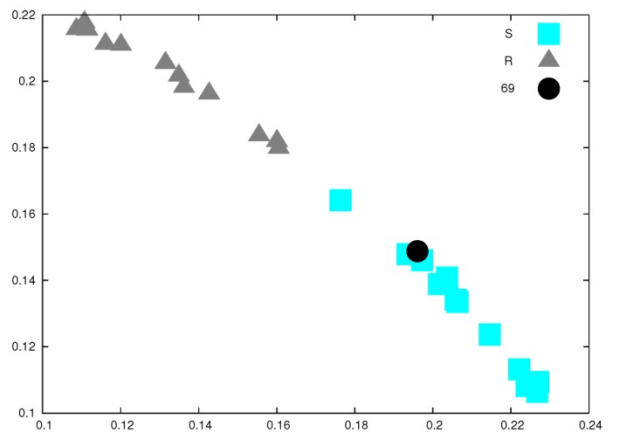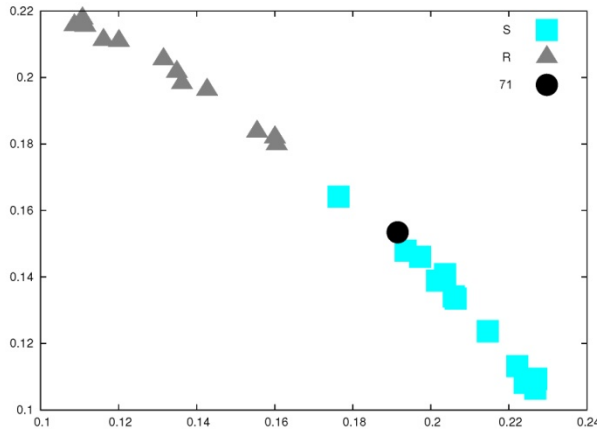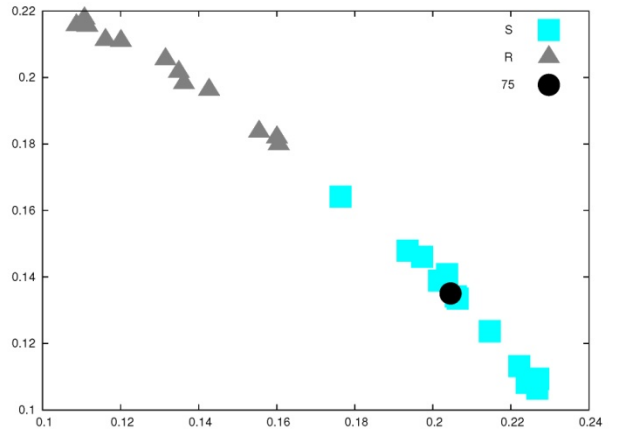

Suppl. Figure 1

Supplement: supp_bgr064_Supp_Fig_1.pdf [file supp_bgr064_Supp_Fig_1.pdf]

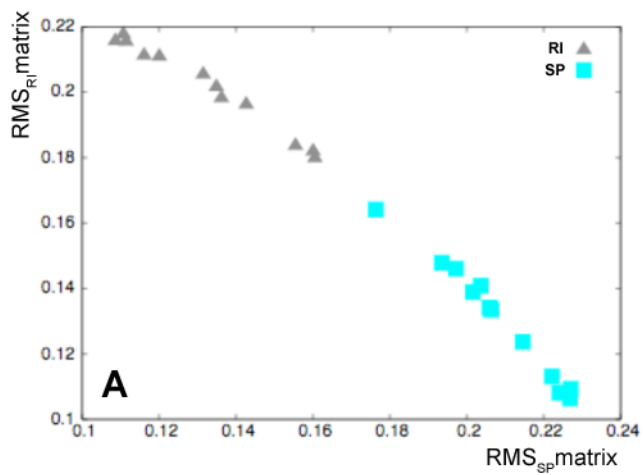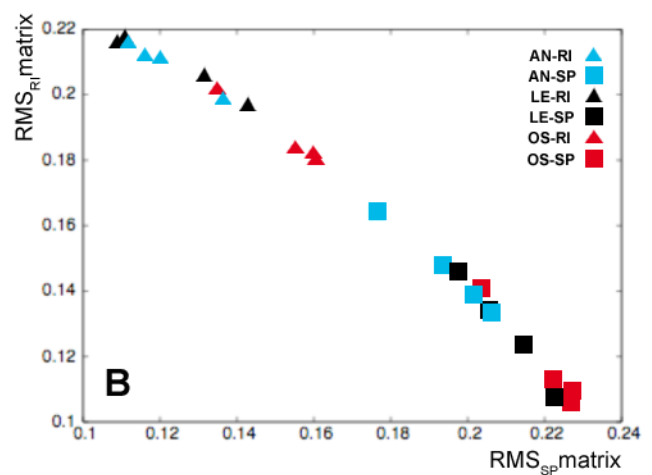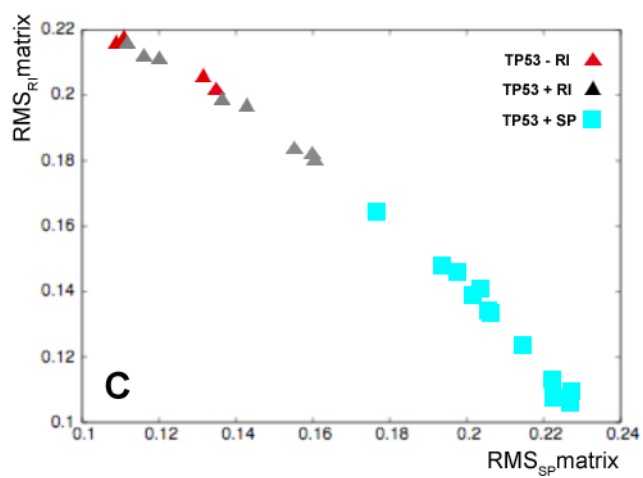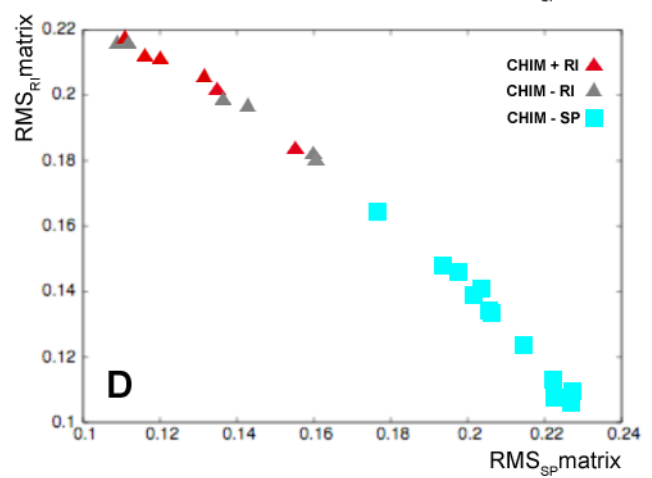

Suppl. Figure 2

Supplement: supp_bgr064_Supp_Fig_2.pdf [file supp_bgr064_Supp_Fig_2.pdf]
